# Active Nuclear Receptors Exhibit Highly Correlated AF-2 Domain Motions

Denise G. Teotico<sup>1</sup>, Monica L. Frazier<sup>2</sup>, Feng Ding<sup>2</sup>, Nikolay V. Dokholyan<sup>2,3</sup>, Brenda R. S. Temple<sup>4</sup>, Matthew R. Redinbo<sup>1,2,3\*</sup>

**1** Department of Chemistry, University of North Carolina at Chapel Hill, Chapel Hill, North Carolina, United States of America, **2** Department of Biochemistry and Biophysics, University of North Carolina at Chapel Hill, Chapel Hill, North Carolina, United States of America, **3** The Lineberger Comprehensive Cancer Center, University of North Carolina at Chapel Hill, Chapel Hill, North Carolina, United States of America, **4** University of North Carolina RL Juliano Structural Bioinformatics Core Facility, Chapel Hill, North Carolina, United States of America

## Abstract

Nuclear receptor ligand binding domains (LBDs) convert ligand binding events into changes in gene expression by recruiting transcriptional coregulators to a conserved activation function-2 (AF-2) surface. While most nuclear receptor LBDs form homo- or heterodimers, the human nuclear receptor pregnane X receptor (PXR) forms a unique and essential homodimer and is proposed to assemble into a functional heterotetramer with the retinoid X receptor (RXR). How the homodimer interface, which is located 30 Å from the AF-2, would affect function at this critical surface has remained unclear. By using 20- to 30-ns molecular dynamics simulations on PXR in various oligomerization states, we observed a remarkably high degree of correlated motion in the PXR–RXR heterotetramer, most notably in the four helices that create the AF-2 domain. The function of such correlation may be to create “active-capable” receptor complexes that are ready to bind to transcriptional coactivators. Indeed, we found in additional simulations that active-capable receptor complexes involving other orphan or steroid nuclear receptors also exhibit highly correlated AF-2 domain motions. We further propose a mechanism for the transmission of long-range motions through the nuclear receptor LBD to the AF-2 surface. Taken together, our findings indicate that long-range motions within the LBD scaffold are critical to nuclear receptor function by promoting a mobile AF-2 state ready to bind coactivators.

**Citation:** Teotico DG, Frazier ML, Ding F, Dokholyan NV, Temple BRS, et al. (2008) Active Nuclear Receptors Exhibit Highly Correlated AF-2 Domain Motions. *PLoS Comput Biol* 4(7): e1000111. doi:10.1371/journal.pcbi.1000111

**Editor:** Jacquelyn S. Fetrow, Wake Forest University, United States of America

**Received:** July 18, 2007; **Accepted:** June 3, 2008; **Published:** July 11, 2008

**Copyright:** © 2008 Teotico et al. This is an open-access article distributed under the terms of the Creative Commons Attribution License, which permits unrestricted use, distribution, and reproduction in any medium, provided the original author and source are credited.

**Funding:** This research was supported by R01 DK62229 (MRR).

**Competing Interests:** The authors have declared that no competing interests exist.

\* E-mail: redinbo@unc.edu

## Introduction

The nuclear receptor (NR) superfamily of ligand-regulated transcription factors controls the expression of genes essential to metabolism, development and systemic homeostasis [1–3]. NRs are modular proteins typically composed of a conserved N-terminal Zn-module DNA binding domain (DBD) that targets specific response elements, a variable hinge region, and a C-terminal ligand binding domain (LBD) capable in most cases of responding to specific small molecule ligands [4]. NR LBDs contain a shallow activation function 2 (AF-2) surface formed by helices  $\alpha 3$ ,  $\alpha 3'$ ,  $\alpha 4$  and  $\alpha AF$  that is essential for ligand-dependent interactions with transcriptional coregulators. The AF-2 surface complexes with LxxLL-containing transcriptional coactivators in the presence of agonist ligands, and with distinct leucine-rich corepressor motifs in the presence of antagonists or in the absence of ligand [4,5].

The pregnane X receptor (PXR) controls the expression of a wide range of gene products involved in xenobiotic metabolism and endobiotic homeostasis [6–8], and is unusual in the NR superfamily in several respects. First, PXR responds promiscuously to a wide range of chemically-distinct ligands from small lipophilic phenobarbital (232 Da) to the large macrolide antibiotic rifampicin (823 Da); in contrast, most NRs are highly specific

for their cognate ligands [9–11]. Second, the PXR of known sequence contain a 50–60 residue insert that, as observed in human [12–14], creates a unique  $\beta$ -turn- $\beta$  motif and novel PXR homodimer interface. All NR LBDs fold into a three-layer  $\alpha$ -helical sandwich in which  $\alpha 10$  forms standard homodimerization interactions (*e.g.*, for steroid receptors like the estrogen receptor- $\alpha$ , ER $\alpha$ ) or heterodimerization interactions (*e.g.*, with RXR for orphan receptors like PXR) [2,15,16]. The PXR LBD, in contrast, contains a second oligomerization interface at the novel  $\beta$ -turn- $\beta$  motif in which intercalating tryptophan and tyrosine residues (Trp-223/Tyr-225) lock across the dimer to form an aromatic zipper [4,5,12] (Figure 1A). It has been shown that this dimer interface is essential to PXR function, and that the specific disruption of homodimerization eliminates the ability of the receptor to interact with transcriptional coactivators like steroid receptor coactivator 1 (SRC-1), but does not impact PXR's subcellular localization or its association with DNA, RXR, or activating ligands [12]. This work led to the proposal of a PXR–RXR heterotetramer as the functional unit [12] (Figures 1A, 1B).

The unique PXR homodimer interface, however, is located more than 30 Å from the coactivator binding site at the receptor's AF-2 surface (Figure 1A). Thus, we hypothesize that long-range motions within the PXR LBD are essential for communicating the stabilizing effect of PXR homodimerization to the AF-2 domain.

## Author Summary

Long-range motions play essential roles in protein function but are difficult to appreciate from static crystal structures. We sought to understand how macromolecular motion affects the formation of transcriptional complexes central to controlling gene expression. Using 20- to 30-ns molecular dynamics simulations, we examined three nuclear receptors that function as ligand-regulated transcription factors: the pregnane X receptor, the peroxisome proliferator-activator receptor- $\gamma$ , and estrogen receptor- $\alpha$ . We found that each of these receptors exhibits a high degree of correlated motions within the domain responsible for forming functionally essential protein-protein interactions with transcriptional coactivators. We further found that specific long-range (up to 30 Å) motions play an important role in these dynamics. Our results show that “active-capable” nuclear receptors are prepared for coactivator contacts by maintaining a mobile but preformed protein-protein interaction surface.

To test this hypothesis, we performed all-atom molecular dynamics (MD) simulations on both the PXR LBD, as well as two other nuclear receptor LBDs, in various states (Table 1). The former orphan peroxisome proliferator-activated receptor- $\gamma$  (PPAR $\gamma$ ) is functional as a heterodimer with RXR, while the steroid estrogen receptor- $\alpha$  (ER $\alpha$ ) is active as an analogous homodimer (Figure 1B). We examined LBDs in inactive states (*e.g.*,

monomers or mutants), as well as those in the proper functional states (*e.g.*, homo- or heterodimers, or as a heterotetramer for RXR) we have termed “active-capable.” Our results support the conclusion that the NR LBD provides a scaffold for long-range motions that prepare the AF-2 surface for binding to transcriptional coactivators.

## Results

### Stable Dynamic Trajectories

Six all-atom molecular dynamics (MD) runs were performed for 20–30 ns on three nuclear receptor LBDs (Table 1). PXR was examined both as a heterodimer with RXR and as a heterotetramer with RXR (30 ns simulations). Wild-type PPAR $\gamma$  was examined as a heterodimer with RXR, and the inactive PPAR $\gamma$  P467L mutant was also examined as a heterodimer with RXR (20 ns simulations). Finally, ER $\alpha$  was examined both in its inactive monomeric state (20 ns), and as an ER $\alpha$  homodimer (25 ns). All six trajectories were judged as stable by two criteria. First, the total energy of each system, calculated as the sum of kinetic and potential energy at each time point, was found to be essentially constant after the first 2–3 ns (Figure 2, Figure S1). These results indicate that after a short period of equilibration, each simulation was sampling an energetically stable conformational ensemble. Second, all trajectories were analyzed in terms of moving average all-atom root mean square deviations (RMSDs) from starting crystal structures over the simulation time course (Figures S2, S3). The PXR-RXR trajectories exhibited RMSD values of 0.7–5.0 Å

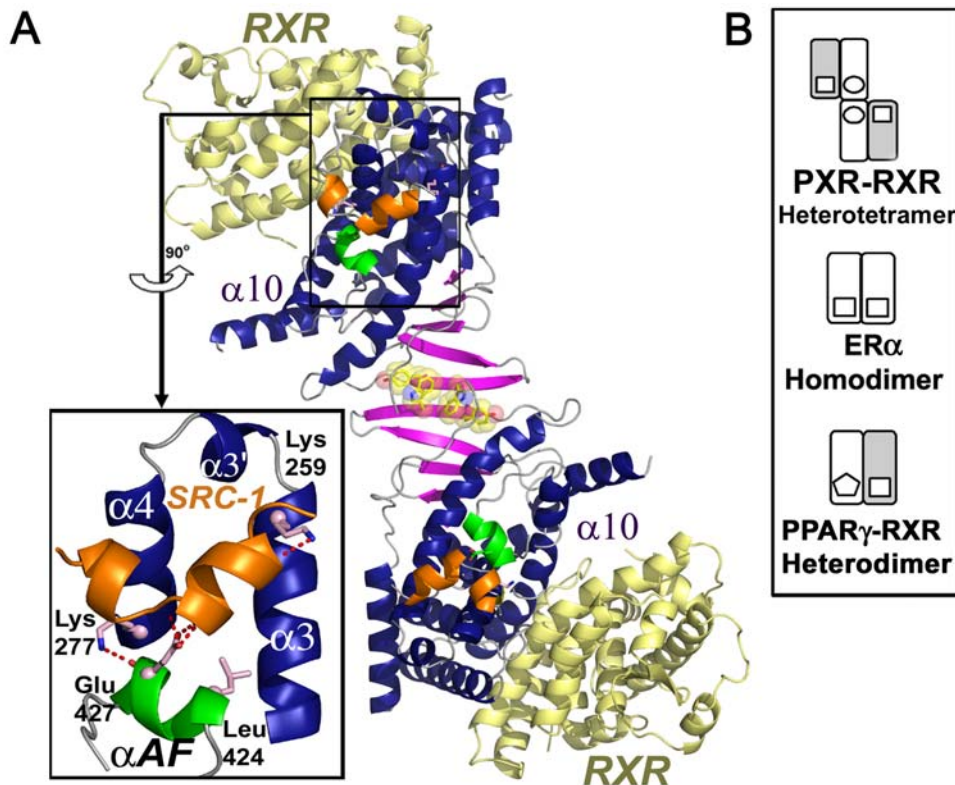

**Figure 1. Structural Features of the PXR-RXR Heterotetramer.** (A) A model of the PXR (blue, magenta, green)-RXR (yellow) heterotetramer highlights the PXR homodimer interface and the ten-stranded intermolecule  $\beta$ -sheet formed between the two monomers. PXR residues Trp-223 and Tyr-225 central to homodimerization are rendered in yellow with transparent CPK spheres. The  $\alpha$ -helices 3, 3', 4 and  $\alpha$ AF (green) create the AF-2 surfaces that bind leucine-rich coactivator peptides like SRC-1 (orange) using a charge clamp (Lys-259, Glu-427) and other residues (light pink). (B) Schematics of the oligomeric NR complexes examined in this paper. doi:10.1371/journal.pcbi.1000111.g001

**Table 1.** Summary of MD Simulations.

| Receptor/Oligomeric State          | PDB ID | Length of Simulation |                         | Activity of State |
|------------------------------------|--------|----------------------|-------------------------|-------------------|
|                                    |        | Total Time           | Period Used in Analysis |                   |
| PXR-RXR heterodimer*               | 1ILG   | 30 ns                | 20–30 ns                | Inactive          |
| PXR-RXR heterotetramer*            | 1ILG   | 30 ns                | 20–30 ns                | Active-capable    |
| PPAR $\gamma$ 467L-RXR heterodimer | 1RDT** | 20 ns                | 10–20 ns                | Inactive          |
| PPAR $\gamma$ -RXR heterodimer     | 1RDT   | 20 ns                | 10–20 ns                | Active-capable    |
| ER $\alpha$ monomer                | 1ERE   | 20 ns                | 10–20 ns                | Inactive          |
| ER $\alpha$ dimer                  | 1ERE   | 25 ns                | 15–25 ns                | Active-capable    |

\*All PXR simulations are based on 1ILG with residues 178–197 modeled in InsightII.

\*\*Single-site mutant of PPAR $\gamma$  generated in Pymol. There is no crystal structure of the mutant.

doi:10.1371/journal.pcbi.1000111.t001

(Figure S2), while the PPAR $\gamma$ - and ER $\alpha$ -containing trajectories exhibited values of 1.7–3.5 Å (Figure S3). Such deviations were considered low for systems of this size (*e.g.*, 1044 residues for the PXR-RXR heterotetramer). The RMSD results indicate that all simulations were stable for at least the last 10 ns of each trajectory (Figures S2, S3). Thus, the final 10 ns section of each simulation was used for subsequent analysis.

### Highly Correlated Motion in the PXR-RXR Heterotetramer

The PXR-RXR heterotetramer is expected to have distinct functional dynamics relative to the heterodimer because the heterotetramer contains the unique PXR homodimer interface shown to be essential for receptor activity [12] (Figure 1). Thus, we examined the PXR LBDs in both the PXR-RXR heterodimer and PXR-RXR heterotetramer simulations over the last 10 ns of each trajectory using essential dynamics analysis. Essential dynamics discriminates between concerted motions of residue clusters within a protein and uncorrelated residue fluctuations [17]. We computed normalized covariance matrices [18] to classify the relationships between all possible residue pairs in the protein (Figure 3A). In this analysis, correlation (two residues moving in the same direction) is indicated by residue-residue correlation coefficients approaching +1, while correlation coefficients approaching  $-1$  indicate anticorrelation (residues moving in opposite directions). Correlation coefficients near zero, in contrast, are associated with residue pairs that lack a dynamic relationship.

The PXR LBDs in the PXR-RXR heterotetramer exhibit significantly more residue-residue correlation relative to the PXR LBD in the PXR-RXR heterodimer (Figure 3A). Indeed, the distribution of correlation coefficients for the PXR LBD in the PXR-RXR heterodimer has one peak centered close to zero, indicating the majority of residue-pairs are not correlated (data not shown). In contrast, the correlation coefficient distribution for the PXR LBDs in the PXR-RXR heterotetramer has two distinct peaks, one positive and one negative, indicating both residue-residue correlation and anticorrelation (data not shown).

Clusters of correlated PXR residues from the PXR-RXR heterodimer and heterotetramer that exhibited concerted motion were then examined for the strength of their residue-residue correlation coefficients and the biological significance of those dynamics. Clustering the PXR LBDs from the PXR-RXR heterotetramer at a correlation coefficient less than 0.6 produced a single cluster containing the complete PXR-RXR homodimer, while clustering at a correlation coefficient above 0.8 resulted in clusters comprised of only 2–5 residues. Neither coefficient cutoff alone could interrogate the biological relevance of the concerted

motions; thus, we classified clusters using three correlation coefficient cutoffs (Figure 3B, C). Such cutoffs discriminate between weak (0.6 or less), medium (between 0.6 and 0.7), and strong (between 0.7 and 0.8) correlations between PXR residues. The same cutoffs set in the heterotetramer were used, for consistency, to cluster the relatively weak correlated motion observed in the PXR-RXR heterodimer. Indeed, the PXR LBD from the heterodimer exhibited only five small correlated clusters, with smaller regions of these weakly correlated clusters remaining at a medium strength correlation coefficient, and only one group of a few residues identifiable at a strong correlation coefficient (Figure 3B).

In distinct contrast, however, the PXR LBDs in the PXR-RXR heterotetramer form a strongly correlated unit (Figure 3C). The  $\beta$ -sheet region involved in the PXR-PXR homodimerization interface ( $\beta$ 1,  $\beta$ 1',  $\beta$ 3,  $\beta$ 4), together with  $\alpha$ -helices 1, 3, 3', 4 and 9, exhibit the strongest degree of correlation; the residues of these  $\beta$ -sheets and  $\alpha$ -helices are all clustered together with a correlation coefficient of 0.8. The neighboring helices, including  $\alpha$ AF, also exhibit highly correlated motion with correlation coefficients  $>0.6$  (Figure 3C). The strength of residue-residue correlations throughout this region suggest that  $\alpha$ 3 forms a critical conduit through which the stabilizing effects of the homodimer interface involving  $\beta$ 1,  $\beta$ 1',  $\beta$ 3, and  $\beta$ 4 are communicated to helices 3, 3', 4 and AF of the AF-2 surface. In the PXR-RXR heterodimer, however, the same  $\beta$ -sheet region is anticorrelated with the AF-2 domain (Figure 3B).

### Highly Correlated Motion in the PXR-RXR Heterotetramer AF-2 Surface

We next examined the motions in the four helices that create the AF-2 coactivator binding surface on PXR:  $\alpha$ 3,  $\alpha$ 3',  $\alpha$ 4, and  $\alpha$ AF. The concerted motion of this surface was compared between the PXR LBDs in the PXR-RXR heterodimer and heterotetramer trajectories, and was examined using both quasiharmonic analysis (QHA) and normal mode analysis (NMA). Both methods have benefits and limitations. For quasiharmonic analysis, its benefits are all-atom resolution and the use of explicit solvent, but it is limited by the time constraints of all-atom MD. Normal mode analysis has the benefit of observing motions on a longer timescale than available with QHA, but is limited to analyses based upon the coarse grained model solely of the macromolecule. Our results agree with others that it takes more NMA modes than QHA modes to describe the same motions [19]. Thus, we employed the first two modes from QHA and first 14 nontrivial modes from NMA (see Methods). Eigenvectors from these analyses are

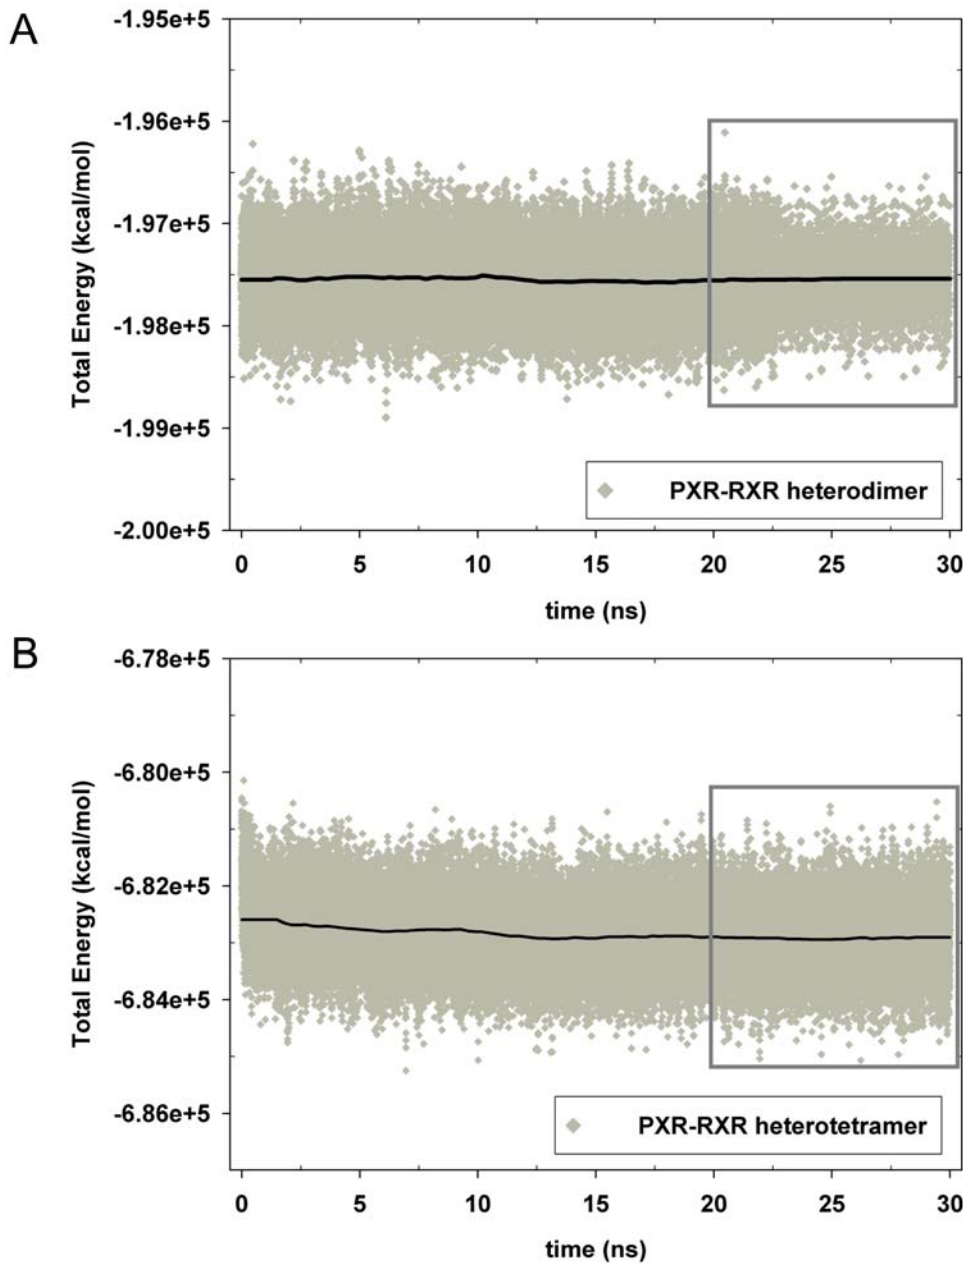

**Figure 2. Conservation of Total Energy During PXR-RXR Simulations.** Total energy (kcal/mol), used as a measure of overall simulation stability, remains relatively constant during the course of both the PXR-RXR heterodimer (A) and PXR-RXR heterotetramer (B) simulations, particularly during the final 10 ns used for analysis (boxed). Both the total energy (grey diamonds) and a running average (black line) are shown.  
doi:10.1371/journal.pcbi.1000111.g002

associated with the magnitude and direction of motion, and these eigenvectors can be used to create visuals of the NR's motion.

After examining the vectors describing the primary modes of motion derived from QHA for each  $\alpha$ -carbon position in the PXR LBDs of the PXR-RXR simulations, a single average vector was calculated to describe the motion of seven of the eleven  $\alpha$ -helices in the LBD. The remaining four helices,  $\alpha 3$ ,  $\alpha 4$ ,  $\alpha AF$  and  $\alpha 10$ , displayed distinct motions at their termini; thus, for these helices, two average vectors were employed. The results of this analysis show that the PXR LBD helices from the PXR-RXR heterotetramer move as a single unit, and in one direction (Figure 4A). This correlation is especially evident in the AF-2 surface, as  $\alpha 3$ ,  $\alpha 3'$ ,  $\alpha 4$  and  $\alpha AF$  all move together in the same direction

(Figure 4A inset). In contrast, the PXR LBD from the PXR-RXR heterodimer exhibited relatively small, disjointed motions (Figure 4B). This lack of helix-helix correlation includes the AF-2 surface helices  $\alpha 3$ ,  $\alpha 3'$ ,  $\alpha 4$  and  $\alpha AF$  (Figure 4B inset).

AF-2 mobility identified by QHA was also assessed by examining the angles between the directions of motion as defined by the eigenvectors for  $\alpha$ -carbons of residues important to coactivator binding (Table 2, Methods). As such, if two residues in the AF-2 surface are moving together, the angle between them is small (see Methods, Equation 1). The average angle from the sum of motion vectors (modes) 1 and 2 between AF-2 domain residues in the PXR-RXR heterodimer simulation was  $71.6^\circ$ . In contrast, the average angle for the same residue pairs in the PXR-

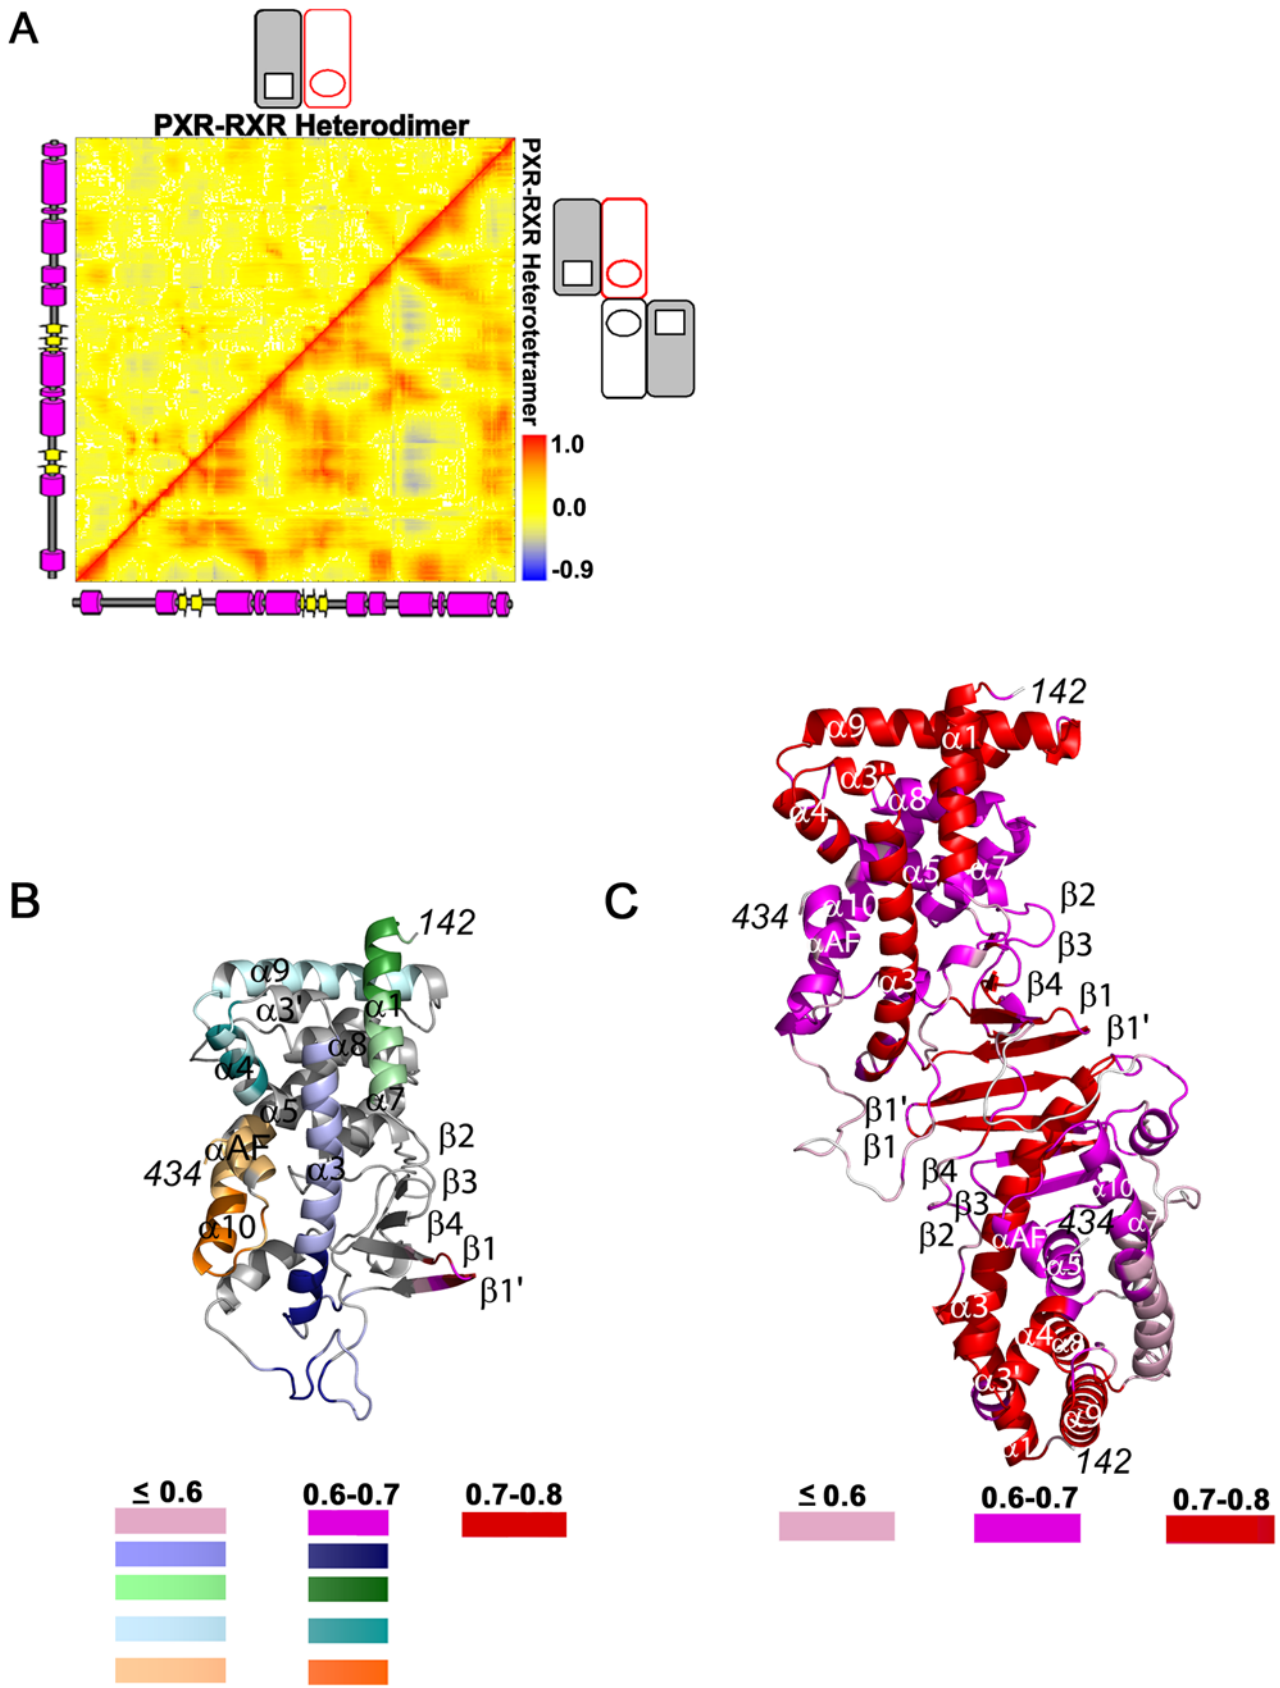

**Figure 3. Highly Correlated Motion in the PXR-RXR Heterotetramer.** (A) Covariance analysis of the PXR LBD in the PXR-RXR heterodimer and heterotetramer. Residue-residue correlation coefficient values range from blue (anticorrelated, -0.9) to red (correlated, +1), with uncorrelated residue pairs in yellow. Secondary structure is provided from right-to-left, and bottom-to-top. (B) Clustering of correlated PXR LBD residues from the PXR-RXR

heterodimer simulation. Eleven clusters were identified, five with a correlation cutoff (CC) of 0.6, five with a CC of 0.7, and one with a CC of 0.8. (C) Clustering of correlated PXR LBD residues from the PXR-RXR heterotetramer simulation. Three clusters were identified, one each with CCs of 0.6, 0.7, and 0.8. Clusters are colored by the maximum correlation coefficient at which they are observed. doi:10.1371/journal.pcbi.1000111.g003

RXR heterotetramer simulation was  $31.5^\circ$  (Table 2). Taken together, these QHA results support the conclusion that the intramolecular  $\beta$ -sheet formed by the PXR homodimer interface produces highly correlated AF-2 surface motions in the PXR-RXR heterotetramer complex.

In a second analysis, modes of motion of the AF-2 surface of the PXR LBD were examined from both the heterodimer and heterotetramer trajectories using NMA. Similar to the QHA study above, angles between the directions of motion as defined by the eigenvectors for  $\alpha$ -carbons of residues important to coactivator binding were calculated (Table 2, Methods). The average angle observed in the AF-2 surface in the PXR-RXR heterotetramer was  $13.5^\circ$  using NMA, even smaller than the average angle found using QHA (Table 2). In contrast, the average angle for the same PXR AF-2 residues in the PXR-RXR heterodimer was  $70.1^\circ$ , nearly identical to the value found using QHA (Table 2). Thus, these data support the conclusions of the QHA study, and indicate that a high degree of helix-helix correlation is present in the AF-2 surface of the PXR-RXR heterotetramer relative to the heterodimer. Similarities between the QHA and NMA results strengthen this collective conclusion, particularly because QHA is based on shorter dynamic movements of all atoms, while NMA examines harmonic oscillations that occur on longer time scales.

Plots of the angles between the vectors of motion of all possible PXR LBD residue pairs from both the heterodimer and heterotetramer simulations for the QHA and NMA studies are shown in Figures 5A and 5B, respectively. Areas in green represent angle values close to zero (vectors moving in the same direction, or correlated), while areas in yellow indicate vectors with angles close to  $180^\circ$  (vectors moving in the opposite direction, or anticorrelated). In both plots, a high degree of correlated motion is observed for the PXR LBD in the PXR-RXR heterotetramer, while significantly less correlation is observed for the LBD in the heterodimer (Figures 5A, B). The similarity between Figures 5A and B, from selected modes of QHA- and NMA-identified motion, and Figure 3A, from all modes of motion, indicates that enough modes were chosen in both QHA and NMA to represent the motion of each LBD (Methods). In addition, both the QHA and NMA plots for the heterotetramer indicate similar correlated structural elements. For example, the PXR  $\beta$ -sheet moves in a more correlated manner with respect to  $\alpha$ AF in the heterotetramer relative to the heterodimer (Figures 5A, B). In summary, long-range motions impacted by the oligomeric state of PXR play a central role in the function of this nuclear xenobiotic receptor.

### Correlated AF-2 Motions in Other Nuclear Receptors

We next examined whether the unliganded LBDs of other members of the NR superfamily would also exhibit correlated AF-2 surface motions. As stated above, 20–25 ns MD simulations were performed on two inactive NR states, the ER $\alpha$  monomer and the PPAR $\gamma$  P467L-RXR heterodimer complex, and on two “active-capable” states, the ER $\alpha$  homodimer and the wild-type PPAR $\gamma$ -RXR heterodimer. A P467L mutation has been shown to inactivate PPAR $\gamma$  [20]. Only moderate levels of residue-residue correlation and anticorrelation were observed for both states of ER $\alpha$  and PPAR $\gamma$  (Figures S4A, B). Examination of correlation coefficient distributions in these simulations reveals that all remain close to zero, indicating relatively non-correlated motion (data not shown).

In spite of their relatively limited overall correlation, however, the active-capable forms of ER $\alpha$  and PPAR $\gamma$ -RXR exhibited correlated AF-2 domain motions. Similar to the analysis of the PXR trajectories, both QHA and NMA were employed to examine these ER $\alpha$  and PPAR $\gamma$  simulations. Results from QHA studies reveal that the active-capable forms of ER $\alpha$ , and PPAR $\gamma$  exhibit more correlated AF-2 motions than their inactive counterparts (Figure 6). Angles between the vectors describing AF-2 surface helix motions in PPAR $\gamma$  and ER $\alpha$  states using both QHA and NMA further support the overall conclusion that active-capable states exhibit correlated AF-2 surfaces (Table 3, 4). For example, the average angles for ER $\alpha$  homodimer and wild type PPAR $\gamma$ -RXR determined using NMA are  $41.0^\circ$  and  $48.8^\circ$ , respectively, while those for the inactive ER $\alpha$  monomer and the PPAR $\gamma$  P467L mutant are  $63.1^\circ$  and  $58.3^\circ$ . Again, the AF-2 correlation in motion observed using the shorter time scales of all-atom molecular dynamics simulations and QHA are also seen in the longer harmonic oscillations of NMA. In summary, correlated motion appears to be a consistent feature in the AF-2 domains of active-capable nuclear receptor LBDs.

### Discussion

The differences in human PXR LBD motion between two oligomeric states of the receptor (as a heterodimer and a heterotetramer with RXR) were examined using molecular dynamics trajectories, essential dynamics, quasiharmonic, and normal mode analyses. It was hypothesized that the PXR heterotetramer, in which PXR LBD monomers form a unique homodimer shown to be critical for transcriptional regulation [12], would exhibit functionally-relevant motion. Indeed, we find that this “active-capable” form of PXR exhibits not only significantly more overall motion and more correlated motion relative to the heterodimer, but also highly correlated motion in the AF-2 surface responsible for functionally-essential contacts with transcriptional coactivators (Figures 4, 5). These data suggest that a high degree of motion promotes the proper function of this nuclear receptor, provided that the motion is correlated to preserve the state of the receptor ready to bind to leucine-rich coactivator motifs.

In addition, these results indicate that long-range motions are critical to the function of the xenobiotic receptor PXR. The homodimer interface unique to the PXR LBD is located approximately 30–35 Å from the AF-2 surface (Figure 1). Essential dynamics have revealed that the  $\beta$ -sheet and six  $\alpha$ -helices in PXR (1, 3, 3', 4, 9, AF), including those that comprise the AF-2 surface, move as a single unit in the heterotetramer trajectory (Figure 3). This suggests a structural mechanism by which PXR homodimerization creates a ten-stranded intermolecular  $\beta$ -sheet (Figure 1) that positively impacts AF-2 domain motion. The N-terminal portion of  $\alpha$ 3 appears to serve as a critical bridge between the PXR  $\beta$ -sheet and the AF-2 helices, such that correlated  $\beta$ 1- $\beta$ 4 motion is “communicated” to  $\alpha$ 3- $\alpha$ 4 and  $\alpha$ AF (Figure 4). This relationship explains how the obligate PXR monomer mutant Trp-223-Ala/Tyr-225-Ala, in which the interlocking aromatic residues at the homodimer interface are eliminated, is still able to bind to ligand, DNA and RXR, but not to transcriptional coactivators at the AF-2 surface [12].

This hypothesized path of “communication through motion” mediated by  $\alpha$ 3 and involving several  $\beta$ -strands, as well as  $\alpha$ 1 and

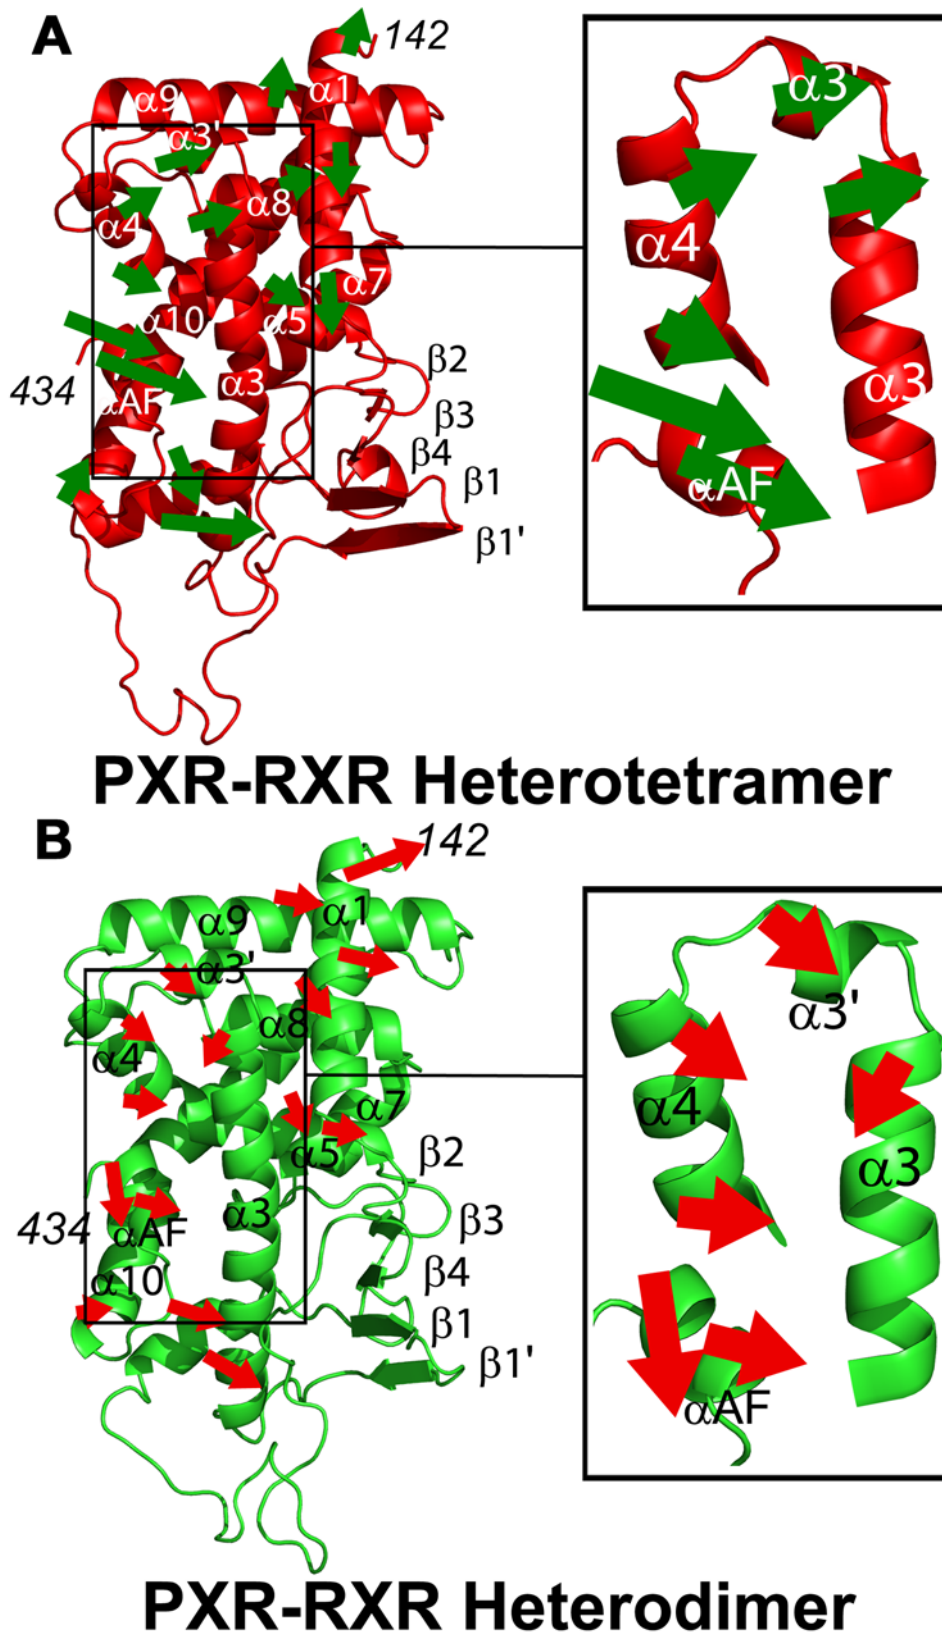

**Figure 4. Correlated AF-2 Domain Motions in the PXR-RXR Heterotetramer.** Vectors describing the motions of PXR LBD  $\alpha$ -helices from the heterotetramer (A) and heterodimer (B) simulations show the active-capable heterotetramer PXR LBD exhibits more overall correlated motion as well as correlation between AF-2 surface helices. Each helix eigenvector (shown by an arrow) is the sum of the  $\alpha$ -carbon eigenvectors in that helix. All arrows were generated using the same scalar magnifications of motion vectors and are presented on the same scale. As such, they represent relative, rather than absolute, movements.  
doi:10.1371/journal.pcbi.1000111.g004

**Table 2.**  $\theta$  Angle Analysis of  $\alpha$ -carbons of PXR LBD.

| $\bar{a}$              | $\bar{b}$              | QHA                     |                      | NMA                     |                      |
|------------------------|------------------------|-------------------------|----------------------|-------------------------|----------------------|
|                        |                        | Active-capable          | Inactive             | Active-capable          | Inactive             |
|                        |                        | PXR from Heterotetramer | PXR from Heterodimer | PXR from Heterotetramer | PXR from Heterodimer |
| Lys277 ( $\alpha 4$ )  | Lys259 ( $\alpha 3$ )  | 21.0°                   | 70.2°                | 7.4°                    | 84.5°                |
| Lys259 ( $\alpha 3$ )  | Glu427 ( $\alpha AF$ ) | 47.9°                   | 83.6°                | 9.7°                    | 104.7°               |
| Lys259 ( $\alpha 3$ )  | Leu424 ( $\alpha AF$ ) | 43.6°                   | 65.1°                | 23.4°                   | 133.3°               |
| Lys277 ( $\alpha 4$ )  | Glu427 ( $\alpha AF$ ) | 31.5°                   | 66.9°                | 6.4°                    | 20.6°                |
| Lys277 ( $\alpha 4$ )  | Leu424 ( $\alpha AF$ ) | 32.1°                   | 99.0°                | 20.2°                   | 48.8°                |
| Leu424 ( $\alpha AF$ ) | Glu427 ( $\alpha AF$ ) | 12.8°                   | 45.0°                | 13.9°                   | 28.8°                |
| <b>Average</b>         |                        | <b>31.5°</b>            | <b>71.6°</b>         | <b>13.5°</b>            | <b>70.1°</b>         |

doi:10.1371/journal.pcbi.1000111.t002

$\alpha 9$ , correlates well with existing PXR structure-function data. First, Met-243, located in the N-terminal portion of  $\alpha 3$ , is contacted by ligands in all reported PXR LBD crystal structures [4,21,22]. Thus, they appear critical for the ligand-enhanced transcriptional activity exhibited by PXR. Second, single mutations in either  $\alpha 3$  or  $\alpha 3'$ , such as Thr-248-Glu, Lys-277-Gln and Pro-268-His, result in a loss of PXR activity [23,24]. In addition, although the  $\alpha 3$  double-mutant Lys-277-Gln/Thr-248-Glu restores transcriptional activation, it abolishes the antagonism of ketoconazole, hypothesized to function by binding the AF-2 surface [24,25]. Third, the  $\alpha 1$  and  $\alpha 9$  mutants Asp-163-Gly and Ala-370-Thr, respectively, represent a class of PXR variants that are distantly located from the AF-2 domain but result in reduced transcriptional activity [26]. Taken together, these data support the conclusion that the wild-type PXR LBD is “tuned” in its heterotetrameric complex with the RXR LBD to produce correlated motions that promote the binding of transcriptional coactivators.

Extension of this analysis into other nuclear receptors revealed correlated AF-2 surface motions in “active-capable” forms of ER $\alpha$  and PPAR $\gamma$  (Figure 6 and Figure S4). Thus, long-range motions may play critical roles in the LBD activation potential of several members of the nuclear receptor superfamily. Our results expand on previous MD investigations of NR LBDs. For example, dynamics studies on ER $\alpha$  [27] showed that the addition of coactivator peptide and ligand to apo ER $\alpha$  lead to increased  $\alpha AF$  helix motion in unspecified directions. Similarly, studies on androgen insensitivity syndrome associated androgen receptor Pro-892-Ala and Pro-892-Leu mutations revealed via biochemical assays and MD simulations an increased flexibility and distortion of the  $\alpha AF$  helix [28]. We present evidence that the AF-2 domain helices of the ER $\alpha$ , PPAR $\gamma$ , and PXR LBDs move together and in the same direction in each receptor. One may postulate that the uncorrelated motion between the helices in the AF-2 domain observed for inactive receptors (e.g., apo PXR-RXR heterodimer,

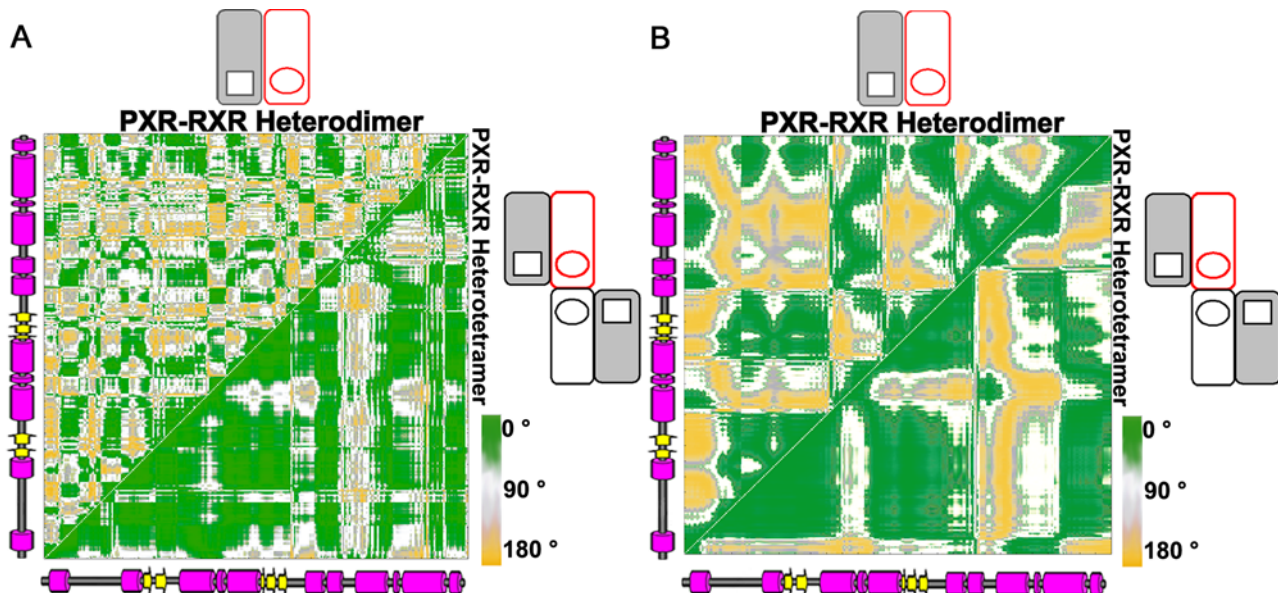

**Figure 5. Quasi-harmonic and Normal Mode Analyses.** Angles between motion vectors for all residue pairs in the PXR-RXR heterodimer and heterotetramer. Motion vectors were identified by quasi-harmonic analysis (QHA, using the first two modes; (A)) and by normal mode analysis (NMA, using the first 14 nontrivial modes; (B)). In the plots, green represents angles close to zero (correlated), while yellow indicates angles close to 180° (anticorrelated).

doi:10.1371/journal.pcbi.1000111.g005



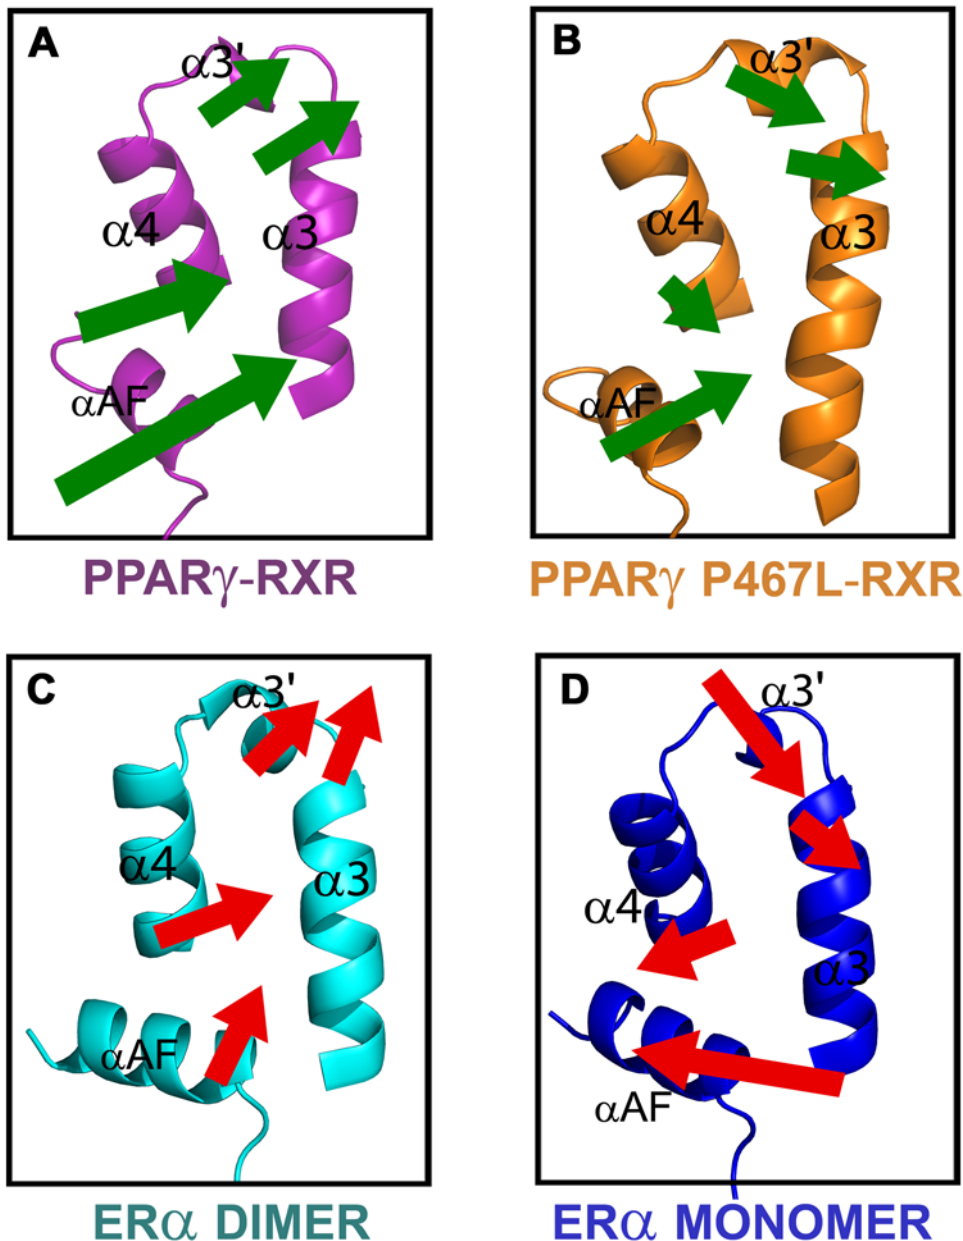

**Figure 6. AF-2 Surface Motions in PPAR $\gamma$  and ER $\alpha$  Complexes.** Similar to Figure 4, the active-capable PPAR $\gamma$ -RXR heterodimer and ER $\alpha$  homodimer complexes exhibit correlated motions in their AF-2 surfaces during MD trajectories (A, C), while inactive states of both receptors exhibit reduced AF-2 surface correlation (B, D).  
doi:10.1371/journal.pcbi.1000111.g006

ER $\alpha$  monomer and the PPAR $\gamma$  P467L-RXR mutant) may represent the initial transition towards an  $\alpha$ AF position required for corepressor binding [29]. Alternatively, these anticorrelated motions may simply prevent coactivator binding to LBDs that are not in active-capable oligomeric states.

The results presented here are also in agreement with limited proteolysis [15], fluorescence polarization [20], and NMR [30,31] studies that examined the stabilization of global and local motions of ER $\alpha$  [15] and PPAR $\gamma$  [20] upon ligand binding. Of particular note are time-resolved fluorescence polarization studies by Kallenberger and Schwabe [20] on the human P467L PPAR $\gamma$  mutant that causes insulin resistance and early onset hypertension. This mutation was found to weaken immobilization of  $\alpha$ AF against the main body of the receptor. In our molecular dynamics

simulations, wild type PPAR $\gamma$ -RXR exhibited a strong degree of correlated AF-2 motion while the PPAR $\gamma$  P467L-RXR mutant showed uncorrelated motion in its AF-2 domain (Figure 6C, D). This is the first model of nuclear receptor dynamics that relates changes in motion to a mutation causing a disease state.

While nuclear receptors are well-established targets for small molecule modulators that treat a wide range of conditions, current drugs function as agonists and antagonists via the ligand binding pocket. However, recent data have indicated that nuclear receptor LBDs can be antagonized using small molecules that block coregulator binding to the AF-2 surface. For example, thyroid receptor antagonists discovered by high-throughput screening were found to act at the AF-2 site of that receptor [32,33]. In addition, the azole family of antifungal compounds has recently

**Table 3.**  $\theta$  Angle Analysis of  $\alpha$ -carbons of PPAR $\gamma$  LBD.

| $\bar{a}$             | $\bar{b}$             | QHA                   |                          | NMA                   |                          |
|-----------------------|-----------------------|-----------------------|--------------------------|-----------------------|--------------------------|
|                       |                       | Active-capable        | Inactive                 | Active-capable        | Inactive                 |
|                       |                       | WT PPAR $\gamma$ -RXR | P467L PPAR $\gamma$ -RXR | WT PPAR $\gamma$ -RXR | P467L PPAR $\gamma$ -RXR |
| Lys277 ( $\alpha$ 4)  | Lys259 ( $\alpha$ 3)  | 3.9°                  | 39.4°                    | 29.2°                 | 0.9°                     |
| Lys259 ( $\alpha$ 3)  | Glu427 ( $\alpha$ AF) | 1.8°                  | 40.2°                    | 61.8°                 | 35.8°                    |
| Lys259 ( $\alpha$ 3)  | Leu424 ( $\alpha$ AF) | 1.2°                  | 37.0°                    | 79.6°                 | 104.1°                   |
| Lys277 ( $\alpha$ 4)  | Glu427 ( $\alpha$ AF) | 4.0°                  | 70.1°                    | 44.2°                 | 36.0°                    |
| Lys277 ( $\alpha$ 4)  | Leu424 ( $\alpha$ AF) | 3.0°                  | 49.2°                    | 60.3°                 | 104.1°                   |
| Leu424 ( $\alpha$ AF) | Glu427 ( $\alpha$ AF) | 1.3°                  | 26.6°                    | 17.9°                 | 68.7°                    |
| <b>Average</b>        |                       | <b>2.5°</b>           | <b>48.8°</b>             | <b>48.8°</b>          | <b>58.3°</b>             |

doi:10.1371/journal.pcbi.1000111.t003

been shown to antagonize the action of human PXR via the AF-2 domain [24,25]. The dynamics data presented here further elucidate the nature of motions essential for AF-2 active-capable function, and may facilitate the improved design or development of therapeutics targeted to specific NR AF-2 surfaces.

## Methods

### Molecular dynamics simulations

Molecular dynamics simulations were run on the apo PXR-RXR LBD heterodimer and heterotetramer. MD simulations were also performed for the nuclear receptors ER $\alpha$  (monomer and homodimer) and PPAR $\gamma$  (wild-type heterodimer with RXR and mutant P467L heterodimer with RXR). A summary of these simulations containing their oligomeric states, starting structure PDB IDs, and activity is provided in Table 1. All starting structures were obtained from the protein databank (www.rcsb.org). The PXR-RXR heterodimer and heterotetramer models as proposed in Noble et al. [12] were generated by first generating a PXR-RXR heterodimer model, followed by overlaying two copies of the heterodimer onto each protomer of the PXR homodimer structure. The PXR-RXR heterodimer model was created by superimposing the PXR LBD onto the LBD of PPAR $\gamma$  in the PPAR $\gamma$ -RXR $\alpha$  heterodimer crystal structure (PDBID: 1FM6). Upon creating this model, the PXR LBD was found to make nearly identical salt bridges, hydrogen bonds and hydrophobic

interactions with the RXR $\alpha$  LBD as seen in the PPAR $\gamma$ -RXR $\alpha$  heterodimer crystal structure.

All MD simulations were carried out with a 2 fs time step using the AMBER 2003 force field [34]. Molecular graphics figures were generated in Pymol (<http://pymol.sourceforge.net>). All production runs employed the PMEMD module from Amber 9.0 [35]. Frames were recorded every 0.4 ps. Topology and parameter files were created using the LEaP program within AMBER [35]. The simulation system consisted of the protein surrounded by a truncated octahedron of water and sodium ions to maintain charge neutrality. An explicit solvent model was used with TIP3P water molecules filling 12.5 Å between the surface of each protein and the edge of the box [36]. Electrostatic interactions were calculated using the particle-mesh Ewald algorithm [37] with a cutoff of 10 Å applied to Lennard-Jones interactions.

The SANDER package within AMBER was used for 5000 steps of energy minimization. Equilibration included 20 ps of constant volume conditions with heating from 100 to 300 K followed by 100 ps constant temperature conditions. Constant volume heating from 200 to 300 K was applied to the system for 20 ps before beginning the production run with the NPT ensemble.

Simulations were analyzed using the PTRAJ package in Amber [35]. All-atom moving average root-mean-square deviations (RMSD) were calculated for each trajectory using the initial crystal structure as reference with an interval of 100 data points. Quasiharmonic analysis was employed for each trajectory using PTRAJ [35].

**Table 4.**  $\theta$  Angle Analysis of  $\alpha$ -carbons of ER $\alpha$  LBD.

| $\bar{a}$             | $\bar{b}$             | QHA               |                     | NMA               |                     |
|-----------------------|-----------------------|-------------------|---------------------|-------------------|---------------------|
|                       |                       | Active-capable    | Inactive            | Active-capable    | Inactive            |
|                       |                       | ER $\alpha$ Dimer | ER $\alpha$ Monomer | ER $\alpha$ Dimer | ER $\alpha$ Monomer |
| Lys277 ( $\alpha$ 4)  | Lys259 ( $\alpha$ 3)  | 26.0°             | 117.8°              | 47.0°             | 48.9°               |
| Lys259 ( $\alpha$ 3)  | Glu427 ( $\alpha$ AF) | 52.1°             | 94.5°               | 59.8°             | 83.4°               |
| Lys259 ( $\alpha$ 3)  | Leu424 ( $\alpha$ AF) | 47.0°             | 122.1°              | 58.1°             | 96.8°               |
| Lys277 ( $\alpha$ 4)  | Glu427 ( $\alpha$ AF) | 28.9°             | 54.1°               | 30.7°             | 59.2°               |
| Lys277 ( $\alpha$ 4)  | Leu424 ( $\alpha$ AF) | 64.0°             | 39.1°               | 38.0°             | 74.4°               |
| Leu424 ( $\alpha$ AF) | Glu427 ( $\alpha$ AF) | 51.4°             | 28.2°               | 12.6°             | 15.6°               |
| <b>Average</b>        |                       | <b>44.9°</b>      | <b>76.0°</b>        | <b>41.0°</b>      | <b>63.1°</b>        |

doi:10.1371/journal.pcbi.1000111.t004

## Loop modeling

In all PXR simulations, a disordered loop (PDB ID 1ILG, residues 178–197) missing from the apo PXR LBD crystal structure was modeled using the MODELLER module of InsightII with database searching ([www.accelrys.com](http://www.accelrys.com)) [38]. The N and C termini of the modeled loop segment were reconnected to the missing sections of the crystal structure to avoid the termini from unrealistic flopping during simulations. The loop was examined for its potential impact on the RMSD from starting crystal structure by analyzing the simulations of the PXR LBD with and without the loop. The loop was found to impact the overall magnitude, but not the variability of the RMSD, suggesting that these regions move more than others, but do not effect stable conformations sampled during the simulation. Therefore, we have omitted the loop from subsequent analyses. However, we chose to include this loop in our simulations because it is a more realistic biological representation of the receptor.

## Correlation analysis

The pair-wise correlation coefficient as described in Sharma et al. [18],  $C_{ij}$ , was computed between  $\alpha$ -carbons of two residues,  $i$  and  $j$ , with values ranging from  $-1$  to  $+1$ . The more positive the value of  $C_{ij}$ , the more correlated (moving in the same direction with one another) the two residues,  $i$  and  $j$ , move. Likewise, the more negative the value of  $C_{ij}$ , the more anticorrelated (moving in the opposite direction to one another) the two residues,  $i$  and  $j$ , move. The single-linkage clustering method [39] was applied to identify distinct sets of residues that move correlated with each other or anticorrelated to each other. In this method, a graph is initially built where each entity corresponds to individual residues. The clustering method proceeds by first finding two entities that have the highest similarity (i.e., the correlation coefficient) between them. After clustering those two entities into one, the similarities between this new entity and the rest are updated. This process is repeated until there are no more entities to cluster or the correlation coefficient cutoff is satisfied. In a single-linkage clustering method, the similarity between two clusters is defined as the largest similarity or the highest correlation coefficient between any two members from the two clusters.

## Angle analysis

Residues chosen to describe motion in Tables 2–4 were not chosen at random in the AF-2 domain of PXR LBD. Glu-427 of  $\alpha$ AF and Lys-259 of  $\alpha$ 3 are the “charge clamp” residues of PXR; the charge clamp is a common structural motif in nuclear receptor-coactivator interactions and involves contacts between the LBD and the termini of the coactivator LxxLL helix. Lys-277 of  $\alpha$ 4 was chosen because it is conserved in many receptors and Leu-424 of  $\alpha$ AF directly contacts the coactivator SRC-1 [14]. Angle analysis was performed using Equation 1 to find the average angle between vectors for  $\alpha$ -carbon  $a$  and  $b$ .

$$\theta = \cos^{-1} \left[ \frac{(\vec{a} \cdot \vec{b})}{(|\vec{a}| |\vec{b}|)} \right] \quad (1)$$

## Quasiharmonic analysis

The effective modes of vibrational motion can be obtained using quasiharmonic analysis by calculating a force field relative to the average structure based on the fluctuations generated from an MD simulation. Quasiharmonic modes, unlike standard principal

component methods, are mass weighted just as normal modes and thus may be compared directly with normal mode analysis. However in quasiharmonic modes, anharmonic effects are implicitly included and thus may be different from normal modes [40]. The percent contribution of each quasiharmonic analysis mode to the overall motion can be evaluated by analyzing the eigenvalues of the first 50 modes. The percent contribution of each mode can be determined by taking the reciprocal of the eigenvalue of one mode and dividing by the sum of the inverse eigenvalues for all 50 modes. The eigenvalue is equivalent to the square of the frequency ( $\text{cm}^{-1}$ ). The percent contribution of each mode (Figure S5) drops off quickly with only the first few modes showing any significant contribution to the overall motion. Modes 1 and 2 in the PXR-RXR heterodimer and heterotetramer simulations represent proximal percent contributions, while in ER $\alpha$  and PPAR $\gamma$ -RXR simulations mode 2 contributed 50% less to overall motion than mode 1 (Figure S5). In order to sample the most relevant motions, the first two modes were analyzed for PXR-RXR simulations and only the first mode was analyzed in the ER $\alpha$  and PPAR $\gamma$ -RXR simulations. In all cases, the first mode(s) were sufficient to describe between 18–33% of the overall motion (Figure S5). To simplify analysis of the PXR-RXR simulations, the sums of the  $x$ ,  $y$  and  $z$  vector components of each atom in each mode were obtained and weighted against the percent contribution.

## Normal mode analysis

Normal mode analysis (NMA) is based on a harmonic approximation of the potential energy function around a minimum energy conformation [41,42]. ELNEMO uses a Hookean potential described by Tirion [41,43], which assumes that the total energy potential function of the reference 3D structure (in this case the crystal structure) is at an energy minimum. In NMA, the lowest energy modes (below 30–100  $\text{cm}^{-1}$ ) have the largest contribution to the amplitude of atomic displacements. However the first six normal or vibrational modes represent rotational and translational motion and are disregarded [44].

Normal mode theory has been shown to accurately describe large conformational transitions in proteins such as hexokinase [45], lysozyme [46,47] and citrate synthase [48] which occur at microsecond or millisecond time scales. Fifty normal modes were generated using the ELNEMO server for each state of the three nuclear receptors [44]. The only change made was the removal of the modeled loop region (residues 178–197) in the PXR-RXR complexes, as these residues resulted in low frequency modes with low collectivity. Collectivity is a measure of the fraction of residues affected by a given mode. Computed normal modes sometimes have localized motion that corresponds to extended parts of the protein and are usually ignored [44]. This was done to confirm that the high degree of correlated motion we observed in simulations involving the active-capable forms of nuclear receptors were relevant at longer time scales.

Just as in the quasiharmonic analysis of the all-atom molecular dynamics simulations, we first sought to determine the minimum number of modes required to obtain an accurate description of the overall motion. Figure S6 shows the percent contribution of each mode, up to the first 50 modes. The first six modes of motion are trivial and have been removed from the analysis. Except for the tetramer, the percent contribution of each of the normal modes appears to drop off more slowly than those of the QH analysis (Figure S5, S6). We chose to analyze modes 7–20, which describe from 48–81% of the overall motion of each nuclear receptor (Figure S6). To simplify the analysis of the modes, we calculated

the vector sum of each atom for modes 7–20, weighted by the percent contribution of each mode.

## Supporting Information

**Figure S1** Conservation of Total Energy During ER $\alpha$  and PPAR $\gamma$ -RXR Simulations. Total energy (kcal/mol), used as a measure of overall simulation stability, remains relatively constant during the course of both ER $\alpha$  and PPAR $\gamma$ -RXR simulations. The final 10 ns (boxed) were used for analysis. Both the total energy (grey diamonds) and a running average (black line) are shown. Found at: doi:10.1371/journal.pcbi.1000111.s001 (0.48 MB TIF)

**Figure S2** Root Mean Square Deviations from Starting Crystal Structures of PXR LBD Trajectories. Both the all-atom RMSD raw data (grey) and moving average (black, dashed line; blue, solid line) are plotted for PXR-RXR simulations. Both trajectories have stable RMSDs after approximately 15 ns. The most stable section of the trajectories, 20–30 ns (boxed), was used for analysis. Found at: doi:10.1371/journal.pcbi.1000111.s002 (2.23 MB TIF)

**Figure S3** Root Mean Square Deviations from Starting Crystal Structures of ER $\alpha$  and PPAR $\gamma$  Simulations. ER $\alpha$  monomer, PPAR $\gamma$ -RXR wild-type, and PPAR $\gamma$  P467L-RXR simulations were stable after 10 ns; data from 10–20 ns (boxed) were used in analysis. The ER $\alpha$  homodimer simulation was considered stable after 15 ns; data from 15–25 ns (boxed) were used in analysis. Moving averages without raw data are plotted to provide clearer visualization. Found at: doi:10.1371/journal.pcbi.1000111.s003 (0.30 MB TIF)

**Figure S4** Normalized Covariance Matrices for ER $\alpha$  and PPAR $\gamma$  Simulations. Correlation/anticorrelation versus secondary structure is shown for ER $\alpha$  monomer versus ER $\alpha$  homodimer (A) and the PPAR $\gamma$  P467L-RXR mutant heterodimer versus wild-type PPAR $\gamma$ -RXR heterodimer (B). Correlation coefficient values are

displayed using colors ranging from blue (completely anticorrelated,  $-0.9$ ) to red (completely correlated,  $+1$ ) with uncorrelated residue pairs in yellow. Secondary structure is provided from left-to-right and bottom-to-top.

Found at: doi:10.1371/journal.pcbi.1000111.s004 (12.26 MB TIF)

**Figure S5** Percent Contribution to Total Motion by Each Mode of Motion Using Quasiharmonic Analysis (First 50 Modes). Modes 1 and 2 were used to analyze motion in the PXR-RXR simulations; only mode 1 was used for all other simulations. Found at: doi:10.1371/journal.pcbi.1000111.s005 (0.25 MB TIF)

**Figure S6** Percent Contribution to Total Motion by Each Mode of Motion Using Normal Mode Analysis (First 50 modes). In normal mode analysis, the first six modes of motion are trivial and have been removed from analysis (Methods). Except for the PXR-RXR heterotetramer, the percent contribution of each of the normal modes appears to drop off more slowly than those in the quasiharmonic analysis. Modes 7–20 were used for analysis, which describe from 48–81% of the overall motion for each nuclear receptor. Found at: doi:10.1371/journal.pcbi.1000111.s006 (0.25 MB TIF)

## Acknowledgments

We thank C.D. Fleming, L.M. Guogas, J. Orans, E.A. Ortlund and S. Lujan for helpful advice, P. Wassam, M. Johnson, J. Bischof, and S. Ramachandran for their experimental and computational assistance.

## Author Contributions

Conceived and designed the experiments: DT MF BT MR. Performed the experiments: DT MF BT. Analyzed the data: DT MF FD BT. Contributed reagents/materials/analysis tools: DT MF FD ND BT. Wrote the paper: DT MF MR.

## References

1. Staudinger J, Liu Y, Madan A, Habeebu S, Klaassen CD (2001) Coordinate regulation of xenobiotic and bile acid homeostasis by pregnane X receptor. *Drug Metab Dispos* 29: 1467–1472.
2. Brzozowski AM, Pike AC, Dauter Z, Hubbard RE, Bonn T, et al. (1997) Molecular basis of agonism and antagonism in the oestrogen receptor. *Nature* 389: 753–758.
3. Goodwin B, Redinbo MR, Klierer SA (2002) Regulation of cyp3a gene transcription by the pregnane x receptor. *Annu Rev Pharmacol Toxicol* 42: 1–23.
4. Orans J, Teotico DG, Redinbo MR (2005) The nuclear xenobiotic receptor pregnane X receptor: recent insights and new challenges. *Mol Endocrinol* 19: 2891–2900.
5. Watkins RE, Noble SM, Redinbo MR (2002) Structural insights into the promiscuity and function of the human pregnane X receptor. *Curr Opin Drug Discov Devel* 5: 150–158.
6. Krasowski MD, Yasuda K, Hagey LR, Schuetz EG (2005) Evolution of the pregnane X receptor: adaptation to cross-species differences in biliary bile salts. *Mol Endocrinol*.
7. Handschin C, Meyer UA (2003) Induction of drug metabolism: the role of nuclear receptors. *Pharmacol Rev* 55: 649–673.
8. Klierer SA, Goodwin B, Willson TM (2002) The nuclear pregnane X receptor: a key regulator of xenobiotic metabolism. *Endocr Rev* 23: 687–702.
9. Ekins S, Mirny L, Schuetz EG (2002) A ligand-based approach to understanding selectivity of nuclear hormone receptors PXR, CAR, FXR, LXRalpha, and LXRbeta. *Pharm Res* 19: 1788–1800.
10. Greschik H, Flaig R, Renaud JP, Moras D (2004) Structural basis for the deactivation of the estrogen-related receptor gamma by diethylstilbestrol or 4-hydroxytamoxifen and determinants of selectivity. *J Biol Chem* 279: 33639–33646.
11. Carlberg C, Molnar F (2006) Detailed molecular understanding of agonistic and antagonistic vitamin D receptor ligands. *Curr Top Med Chem* 6: 1243–1253.
12. Noble SM, Carnahan VE, Moore LB, Luntz T, Wang H, et al. (2006) Human PXR forms a tryptophan zipper-mediated homodimer. *Biochemistry* 45: 8579–8589.
13. Watkins RE, Wisely GB, Moore LB, Collins JL, Lambert MH, et al. (2001) The human nuclear xenobiotic receptor PXR: structural determinants of directed promiscuity. *Science* 292: 2329–2333.
14. Watkins RE, Davis-Searles PR, Lambert MH, Redinbo MR (2003) Coactivator binding promotes the specific interaction between ligand and the pregnane X receptor. *J Mol Biol* 331: 815–828.
15. Tamrazi A, Carlson KE, Daniels JR, Hurth KM, Katzenellenbogen JA (2002) Estrogen receptor dimerization: ligand binding regulates dimer affinity and dimer dissociation rate. *Mol Endocrinol* 16: 2706–2719.
16. Klierer SA (2003) The nuclear pregnane X receptor regulates xenobiotic detoxification. *J Nutr* 133: 2444S–2447S.
17. Amadei A, Linssen AB, Berendsen HJ (1993) Essential dynamics of proteins. *Proteins* 17: 412–425.
18. Sharma S, Ding F, Dokholyan NV (2007) Multiscale modeling of nucleosome dynamics. *Biophys J* 92: 1457–1470.
19. Rueda M, Chacon P, Orozco M (2007) Thorough validation of protein normal mode analysis: a comparative study with essential dynamics. *Structure* 15: 565–575.
20. Kallenberger BC, Love JD, Chatterjee VK, Schwabe JW (2003) A dynamic mechanism of nuclear receptor activation and its perturbation in a human disease. *Nat Struct Biol* 10: 136–140.
21. Xue Y, Chao E, Zuercher WJ, Willson TM, Collins JL, et al. (2007) Crystal structure of the PXR-T1317 complex provides a scaffold to examine the potential for receptor antagonism. *Bioorg Med Chem* 15: 2156–2166.
22. Xue Y, Moore LB, Orans J, Peng L, Bencharit S, et al. (2007) Crystal structure of the pregnane X receptor-estradiol complex provides insights into endobiotic recognition. *Mol Endocrinol* 21: 1028–1038.
23. Shulman AI, Larson C, Mangelsdorf DJ, Ranganathan R (2004) Structural determinants of allosteric ligand activation in RXR heterodimers. *Cell* 116: 417–429.
24. Wang H, Huang H, Li H, Teotico DG, Sinz M, et al. (2007) Activated pregnenolone X-receptor is a target for ketoconazole and its analogs. *Clin Cancer Res* 13: 2488–2495.
25. Huang H, Wang H, Sinz M, Zoeckler M, Staudinger J, et al. (2007) Inhibition of drug metabolism by blocking the activation of nuclear receptors by ketoconazole. *Oncogene* 26: 258–268.
26. Hustert E, Zibat A, Presecan-Siedel E, Eiselt R, Mueller R, et al. (2001) Natural protein variants of pregnane X receptor with altered transactivation activity toward CYP3A4. *Drug Metab Dispos* 29: 1454–1459.

27. Celik L, Lund JD, Schiott B (2007) Conformational dynamics of the estrogen receptor alpha: molecular dynamics simulations of the influence of binding site structure on protein dynamics. *Biochemistry* 46: 1743–1758.
28. Elhaji YA, Stoica I, Dennis S, Purisima EO, Trifiro MA (2006) Impaired helix 12 dynamics due to proline 892 substitutions in the androgen receptor are associated with complete androgen insensitivity. *Hum Mol Genet* 15: 921–931.
29. Renaud JP, Rochel N, Ruff M, Vivat V, Chambon P, et al. (1995) Crystal structure of the RAR-gamma ligand-binding domain bound to all-trans retinoic acid. *Nature* 378: 681–689.
30. Johnson BA, Wilson EM, Li Y, Moller DE, Smith RG, et al. (2000) Ligand-induced stabilization of PPARgamma monitored by NMR spectroscopy: implications for nuclear receptor activation. *J Mol Biol* 298: 187–194.
31. Chalmers MJ, Busby SA, Pascal BD, He Y, Hendrickson CL, et al. (2006) Probing protein ligand interactions by automated hydrogen/deuterium exchange mass spectrometry. *Anal Chem* 78: 1005–1014.
32. Arnold LA, Estebanez-Perpina E, Togashi M, Shelat A, Ocasio CA, et al. (2006) A high-throughput screening method to identify small molecule inhibitors of thyroid hormone receptor coactivator binding. *Sci STKE* 2006: pl3.
33. Arnold LA, Estebanez-Perpina E, Togashi M, Jouravel N, Shelat A, et al. (2005) Discovery of small molecule inhibitors of the interaction of the thyroid hormone receptor with transcriptional coregulators. *J Biol Chem* 280: 43048–43055.
34. Duan Y, Wu C, Chowdhury S, Lee MC, Xiong G, et al. (2003) A point-charge force field for molecular mechanics simulations of proteins based on condensed-phase quantum mechanical calculations. *J Comput Chem* 24: 1999–2012.
35. Case DA, Darden TA, Cheatham TE III, Simmerling CL, Wang J, et al. (2006) AMBER 9, University of California: San Francisco.
36. Jorgensen WL, Chandrasekhar J, Madura JD, Impey RW, Klein ML (1983) Comparison of simple potential functions for simulating liquid water. *J Chem Phys* 79: 926–935.
37. Essman U, Perera L, Berkowitz ML, Darden TA, Lee H, et al. (1995) A smooth particle mesh Ewald method. *J Chem Phys* 103: 8577–8593.
38. Schuler GD, Altschul SF, Lipman DJ (1991) A workbench for multiple alignment construction and analysis. *Proteins* 9: 180–190.
39. Everitt BS, Landau S, Leese M (2001) *Cluster Analysis*. Oxford University Press: Oxford.
40. Brooks BR, Janezic D, Karplus M (1995) Harmonic Analysis of Large Systems. I. Methodology. *Journal of Computational Chemistry* 16: 1522–1542.
41. Tirion MM (1996) Large Amplitude Elastic Motions in Proteins from a Single-Parameter, Atomic Analysis. *Phys Rev Lett* 77: 1905–1908.
42. Hinsen K (1998) Analysis of domain motions by approximate normal mode calculations. *Proteins* 33: 417–429.
43. Tama F, Sanejouand YH (2001) Conformational change of proteins arising from normal mode calculations. *Protein Eng* 14: 1–6.
44. Suhre K, Sanejouand YH (2004) ElNemo: a normal mode web server for protein movement analysis and the generation of templates for molecular replacement. *Nucleic Acids Res* 32: W610–614.
45. Harrison RW (1984) Variational calculation of the normal modes of a large macromolecule: methods and some initial results. *Biopolymers* 23: 2943–2949.
46. Brooks B, Karplus M (1985) Normal modes for specific motions of macromolecules: application to the hinge-bending mode of lysozyme. *Proc Natl Acad Sci U S A* 82: 4995–4999.
47. Gibrat JF, Go N (1990) Normal mode analysis of human lysozyme: study of the relative motion of the two domains and characterization of the harmonic motion. *Proteins* 8: 258–279.
48. Marques O, Sanejouand YH (1995) Hinge-bending motion in citrate synthase arising from normal mode calculations. *Proteins* 23: 557–560.
